# Supplementary material
Source: HighWire-hosted journal article supplement (https://erj.ersjournals.com/content/54/1/1900098)
Supplement: inline-supplementary-material-1 [file inline-supplementary-material-1.pdf]

**“Differential blood pressure response to CPAP treatment according to the circadian pattern in hypertensive patients with obstructive sleep apnea”**

Sapiña-Beltrán Esther MSc<sup>a,b</sup>, Torres Gerard MD<sup>a</sup>, Benítez Iván BSc (Stat)<sup>a,b</sup>, Santamaría-Martos Fernando MSc<sup>a</sup>, Durán-Cantolla Joaquín MD<sup>b,c</sup>, Egea Carlos MD<sup>b,d</sup>, Sánchez-de-la-Torre Manuel PhD<sup>a,b</sup>, Barbé Ferrán MD<sup>a,b</sup>, Dalmases Mireia MD<sup>a,b</sup>, on behalf of the Spanish Sleep and Breathing Group

<sup>a</sup>Hospital Universitari Arnau de Vilanova and Santa Maria, Group of Translational Research in Respiratory Medicine, IRB Lleida, Universitat de Lleida, Lleida, Spain

<sup>b</sup>Centro de Investigación Biomédica en Red de Enfermedades Respiratorias (CIBERES), Madrid, Spain

<sup>c</sup>Bioaraba Research Institute. OSI Araba University Hospital. Department of Medicine of Basque Country University, Vitoria-Gasteiz, Spain

<sup>d</sup>Unidad Funcional de Sueño. Bioaraba Research Institute. OSI Araba University Hospital. Department of Medicine of Basque Country University, Vitoria-Gasteiz, Spain

**Corresponding author**

Mireia Dalmases Cleries MD, PhD. Hospital Universitari Arnau de Vilanova and Santa Maria, Group of Translational Research in Respiratory Medicine, IRB Lleida, Universitat de Lleida, Lleida, Spain; Centro de Investigación Biomédica en Red de Enfermedades Respiratorias (CIBERES), Madrid, Spain.

Electronic address: mdalmases.lleida.ics@gencat.cat.

**Take a message**

Only nondipper patients significantly benefited from CPAP treatment in terms of BP reduction. The study suggests that performing an ABPM before prescribing CPAP to hypertensive patients may be important in clinical practice to predict the blood pressure response.

**Table S1. Changes in blood pressure at twelve weeks according to the circadian pattern**

|                        | Dipper                    |                               | Nondipper                     |                                |
|------------------------|---------------------------|-------------------------------|-------------------------------|--------------------------------|
|                        | Sham<br>N=62              | CPAP<br>N=51                  | Sham<br>N=73                  | CPAP<br>N=86                   |
| <b>24h- ABPM</b>       |                           |                               |                               |                                |
| Mean (mmHg)            |                           |                               |                               |                                |
| Baseline               | 95.9 (93.47 to 98.33)     | 98.51 (95.99 to 101.02)       | 99.62 (97.9 to 101.34)        | 98.5 (97.05 to 99.95)          |
| 3 months               | 95.24 (92.74 to 97.75)    | 97.41 (94.62 to 100.2)        | 99.36 (97.47 to 101.24)       | 95.38 (93.73 to 97.02)         |
| Change                 | -0.66 (-2.13 to 0.81)     | -1.1 (-2.78 to 0.57)          | -0.26 (-1.61 to 1.08)         | <b>-3.12 (-4.53 to -1.71)</b>  |
| Systolic (mmHg)        |                           |                               |                               |                                |
| Baseline               | 127.65 (124.42 to 130.88) | 130.67 (127.03 to 134.31)     | 130.83 (128.68 to 132.97)     | 130.84 (128.98 to 132.71)      |
| 3 months               | 126.51 (123.24 to 129.78) | 128.9 (125.12 to 132.68)      | 130.48 (127.77 to 133.19)     | 126.6 (124.34 to 128.86)       |
| Change                 | -1.14 (-3.01 to 0.73)     | -1.77 (-4.23 to 0.69)         | -0.35 (-2.08 to 1.38)         | <b>-4.24 (-6.31 to -2.17)</b>  |
| Diastolic (mmHg)       |                           |                               |                               |                                |
| Baseline               | 80.03 (77.78 to 82.27)    | 82.42 (80.21 to 84.64)        | 84.02 (82.25 to 85.79)        | 82.33 (80.77 to 83.88)         |
| 3 months               | 79.61 (77.08 to 82.13)    | 81.66 (79.08 to 84.24)        | 83.79 (82.1 to 85.49)         | 79.76 (78.08 to 81.45)         |
| Change                 | -0.42 (-2.01 to 1.17)     | -0.76 (-2.26 to 0.73)         | -0.22 (-1.46 to 1.01)         | <b>-2.56 (-3.77 to -1.35)</b>  |
| <b>Daytime- ABPM</b>   |                           |                               |                               |                                |
| Mean (mmHg)            |                           |                               |                               |                                |
| Baseline               | 101.24 (98.71 to 103.77)  | 104.34 (101.66 to 107.02)     | 100.99 (99.29 to 102.69)      | 100.11 (98.61 to 101.61)       |
| 3 months               | 100.06 (97.28 to 102.84)  | 102.27 (99.42 to 105.13)      | 101.54 (99.71 to 103.37)      | 98.34 (96.54 to 100.15)        |
| Change                 | -1.18 (-2.94 to 0.58)     | <b>-2.07 (-3.89 to -0.25)</b> | 0.55 (-0.8 to 1.89)           | <b>-1.76 (-3.32 to -0.21)</b>  |
| Systolic (mmHg)        |                           |                               |                               |                                |
| Baseline               | 133.76 (130.43 to 137.08) | 137.57 (133.72 to 141.42)     | 132.4 (130.47 to 134.33)      | 132.49 (130.64 to 134.33)      |
| 3 months               | 131.98 (128.35 to 135.62) | 134.75 (130.9 to 138.59)      | 132.7 (130.25 to 135.14)      | 129.9 (127.59 to 132.21)       |
| Change                 | -1.77 (-3.95 to 0.4)      | <b>-2.82 (-5.43 to -0.22)</b> | 0.3 (-1.42 to 2.02)           | <b>-2.59 (-4.73 to -0.46)</b>  |
| Diastolic (mmHg)       |                           |                               |                               |                                |
| Baseline               | 84.98 (82.6 to 87.37)     | 87.73 (85.34 to 90.11)        | 85.29 (83.48 to 87.1)         | 83.92 (82.3 to 85.54)          |
| 3 months               | 84.1 (81.33 to 86.87)     | 86.04 (83.39 to 88.69)        | 85.96 (84.24 to 87.68)        | 82.57 (80.69 to 84.45)         |
| Change                 | -0.89 (-2.75 to 0.97)     | <b>-1.69 (-3.32 to -0.05)</b> | 0.67 (-0.59 to 1.93)          | -1.35 (-2.74 to 0.05)          |
| <b>Nighttime- ABPM</b> |                           |                               |                               |                                |
| Mean (mmHg)            |                           |                               |                               |                                |
| Baseline               | 85.22 (82.77 to 87.67)    | 86.84 (84.36 to 89.33)        | 96.88 (94.79 to 98.97)        | 95.28 (93.77 to 96.78)         |
| 3 months               | 85.61 (83.27 to 87.95)    | 87.67 (84.53 to 90.81)        | 94.99 (92.66 to 97.32)        | 89.44 (87.59 to 91.28)         |
| Change                 | 0.39 (-1.1 to 1.87)       | 0.83 (-1.41 to 3.07)          | <b>-1.89 (-3.73 to -0.05)</b> | <b>-5.84 (-7.63 to -4.06)</b>  |
| Systolic (mmHg)        |                           |                               |                               |                                |
| Baseline               | 115.44 (112.16 to 118.71) | 116.88 (113.29 to 120.48)     | 127.68 (124.78 to 130.59)     | 127.56 (125.43 to 129.68)      |
| 3 months               | 115.56 (112.57 to 118.56) | 117.22 (112.92 to 121.51)     | 126.04 (122.34 to 129.74)     | 120.01 (117.38 to 122.64)      |
| Change                 | 0.13 (-1.84 to 2.1)       | 0.33 (-3.01 to 3.68)          | -1.64 (-4.17 to 0.89)         | <b>-7.55 (-10.12 to -4.97)</b> |
| Diastolic (mmHg)       |                           |                               |                               |                                |
| Baseline               | 70.11 (67.89 to 72.33)    | 71.82 (69.65 to 74)           | 81.48 (79.36 to 83.6)         | 79.14 (77.59 to 80.69)         |
| 3 months               | 70.63 (68.25 to 73)       | 72.9 (70.06 to 75.74)         | 79.47 (77.49 to 81.44)        | 74.15 (72.39 to 75.91)         |
| Change                 | 0.52 (-1.05 to 2.08)      | 1.08 (-0.86 to 3.02)          | <b>-2.01 (-3.82 to -0.21)</b> | <b>-4.99 (-6.52 to -3.46)</b>  |

Note: statistically significant p values (p values less than 0.05) are shown in bold. Abbreviations: ABPM=Ambulatory Blood Pressure Monitoring

**Table S2. Changes in blood pressure by circadian pattern group**

| Blood Pressure         | Dipper<br>(Sham=62/CPAP=51)          |                | Nondipper<br>(Sham=73/CPAP=86)       |                | Difference                           |                |
|------------------------|--------------------------------------|----------------|--------------------------------------|----------------|--------------------------------------|----------------|
|                        | <i>CPAP effect<br/>mean (95% CI)</i> | <i>p value</i> | <i>CPAP effect<br/>mean (95% CI)</i> | <i>p value</i> | <i>CPAP effect<br/>mean (95% CI)</i> | <i>p value</i> |
| 24h- ABPM (mmHg)       |                                      |                |                                      |                |                                      |                |
| Mean                   | 0·06 (-2·13 to 2·25)                 | 0·9999         | -3·08 (-4·91 to -1·24)               | <b>0·0064</b>  | -3·14 (-6·02 to -0·26)               | <b>0·0328</b>  |
| Systolic               | -0·07 (-3·12 to 2·98)                | 1              | -3·89 (-6·45 to -1·34)               | <b>0·0163</b>  | -3·83 (-7·82 to 0·17)                | 0·0606         |
| Diastolic              | 0·07 (-1·97 to 2·11)                 | 0·9999         | -2·63 (-4·35 to -0·92)               | <b>0·0152</b>  | -2·71 (-5·4 to -0·02)                | <b>0·0486</b>  |
| Daytime- ABPM (mmHg)   |                                      |                |                                      |                |                                      |                |
| Mean                   | -0·25 (-2·66 to 2·16)                | 0·9969         | -2·49 (-4·51 to -0·48)               | 0·0754         | -2·24 (-5·4 to 0·93)                 | 0·1648         |
| Systolic               | -0·28 (-3·49 to 2·93)                | 0·9982         | -2·88 (-5·56 to -0·19)               | 0·1568         | -2·6 (-6·8 to 1·61)                  | 0·2257         |
| Diastolic              | -0·3 (-2·58 to 1·99)                 | 0·9942         | -2·27 (-4·19 to -0·35)               | 0·0959         | -1·97 (-4·98 to 1·03)                | 0·1974         |
| Nighttime- ABPM (mmHg) |                                      |                |                                      |                |                                      |                |
| Mean                   | 0·87 (-1·84 to 3·58)                 | 0·9229         | -4·37 (-6·66 to -2·09)               | <b>0·0012</b>  | -5·24 (-8·81 to -1·67)               | <b>0·0042</b>  |
| Systolic               | 0·55 (-3·33 to 4·44)                 | 0·9923         | -5·93 (-9·2 to -2·67)                | <b>0·0025</b>  | -6·49 (-11·58 to -1·39)              | <b>0·0128</b>  |
| Diastolic              | 1·04 (-1·44 to 3·52)                 | 0·8447         | -3·63 (-5·73 to -1·53)               | <b>0·0045</b>  | -4·67 (-7·94 to -1·39)               | <b>0·0054</b>  |

Estimated CPAP effects using a linear model adjusted for baseline measurements. The model includes treatment, circadian pattern and their interaction. Statistically significant p values (p values less than 0·05) are shown in bold. Abbreviations: ABPM= Ambulatory Blood Pressure Monitoring; CPAP= Continuous Positive Airway Pressure.

**eTable S3. CPAP effect on blood pressure according to the circadian pattern in true hypertensive subjects adjusted by confounding factors**

| Blood Pressure          | Dipper<br>(Sham=33/CPAP=43)          |                | Nondipper<br>(Sham =58/CPAP=62)      |                | Difference                           |                |
|-------------------------|--------------------------------------|----------------|--------------------------------------|----------------|--------------------------------------|----------------|
|                         | <i>CPAP effect<br/>mean (95% CI)</i> | <i>p value</i> | <i>CPAP effect<br/>mean (95% CI)</i> | <i>p value</i> | <i>CPAP effect<br/>mean (95% CI)</i> | <i>p value</i> |
| 24h- ABPM (mmHg)        |                                      |                |                                      |                |                                      |                |
| Mean                    | 0·01 (-2·86 to 2·88)                 | 0·9999         | -3·27 (-5·4 to -1·14)                | <b>0·016</b>   | -3·28 (-6·88 to 0·33)                | 0·0745         |
| Systolic                | 0·78 (-3·17 to 4·72)                 | 0·9804         | -4·8 (-7·72 to -1·88)                | <b>0·0083</b>  | -5·58 (-10·54 to -0·62)              | <b>0·0277</b>  |
| Diastolic               | -0·32 (-3·1 to 2·45)                 | 0·9957         | -2·52 (-4·58 to -0·46)               | 0·0821         | -2·19 (-5·68 to 1·29)                | 0·2162         |
| Daytime- ABPM (mmHg)    |                                      |                |                                      |                |                                      |                |
| Mean                    | -0·98 (-4·13 to 2·17)                | 0·9294         | -2·7 (-5·04 to -0·36)                | 0·1115         | -1·72 (-5·68 to 2·24)                | 0·3924         |
| Systolic                | -0·32 (-4·45 to 3·8)                 | 0·9987         | -3·72 (-6·79 to -0·66)               | 0·0841         | -3·4 (-8·59 to 1·79)                 | 0·1977         |
| Diastolic               | -1·3 (-4·4 to 1·8)                   | 0·8445         | -2·19 (-4·49 to 0·11)                | 0·2459         | -0·89 (-4·79 to 3)                   | 0·6516         |
| Nighttime - ABPM (mmHg) |                                      |                |                                      |                |                                      |                |
| Mean                    | 1·8 (-1·7 to 5·31)                   | 0·7441         | -4·55 (-7·15 to -1·95)               | <b>0·0042</b>  | -6·35 (-10·74 to -1·97)              | <b>0·0048</b>  |
| Systolic                | 2·61 (-2·57 to 7·79)                 | 0·7572         | -6·92 (-10·75 to -3·09)              | <b>0·0028</b>  | -9·53 (-16·02 to -3·04)              | <b>0·0042</b>  |
| Diastolic               | 1·44 (-1·78 to 4·66)                 | 0·8164         | -3·51 (-5·91 to -1·1)                | <b>0·0242</b>  | -4·95 (-8·99 to -0·91)               | <b>0·0167</b>  |

Estimated CPAP effects using a linear model adjusted for baseline measurements, age, sex, BMI, and AHI. The model includes treatment, circadian pattern and their interaction. Statistically significant p values (p values less than 0.05) are shown in bold. Abbreviations: ABPM= Ambulatory Blood Pressure Monitoring; CPAP= Continuous Positive Airway Pressure
